# Supplementary material for: Validation of lake surface state in the HIRLAM v.7.4 numerical weather prediction model against in situ measurements in Finland
Source: Copernicus journal article supplement (doi:10.5194/gmd-12-3707-2019), 2019-08-23
Supplement: Supplementary file 1 [file gmd-12-3707-2019-supplement.zip]

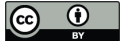

## *Supplement of*

# **Validation of lake surface state in the HIRLAM v.7.4 numerical weather prediction model against in situ measurements in Finland**

**Laura Rontu et al.**

*Correspondence to:* Laura Rontu ([laura.rontu@fmi.fi](mailto:laura.rontu@fmi.fi))

- [gmd-12-3707-2019-supplement-title-page.pdf](#)
- [README](#)
- [anfeedback.dat](#)
- [dates\\_by\\_station.dat](#)
- [ts4001\\_an](#)
- [ts4002\\_an](#)
- [ts4003\\_an](#)
- [ts4004\\_an](#)
- [ts4005\\_an](#)
- [ts4006\\_an](#)
- [ts4007\\_an](#)
- [ts4008\\_an](#)
- [ts4009\\_an](#)
- [ts4010\\_an](#)
- [ts4011\\_an](#)
- [ts4012\\_an](#)
- [ts4013\\_an](#)
- [ts4014\\_an](#)
- [ts4015\\_an](#)
- [ts4016\\_an](#)

- ts4017\_an
- ts4018\_an
- ts4019\_an
- ts4020\_an
- ts4021\_an
- ts4022\_an
- ts4023\_an
- ts40241\_an
- ts4024\_an
- ts4025\_an
- ts40261\_an
- ts40263\_an
- ts4026\_an
- ts40271\_an
- ts40272\_an
- ts40277\_an
- ts40278\_an
- ts4027\_an
- ts40282\_an
- ts40308\_an
- ts40313\_an
- ts40328\_an
- ts40330\_an
- ts40331\_an
- ts40335\_an
- ts40336\_an
- ts40342\_an
- ts40343\_an
- ts40345\_an

The copyright of individual parts of the supplement might differ from the CC BY 4.0 License.
